# Supplementary material for: Ni-based catalysts supported on Mg–Al hydrotalcites with different morphologies for CO2 methanation: exploring the effect of metal–support interaction
Source: Royal Society of Chemistry journal article supplement (doi:10.1039/c9cy02523e), 2020-01-01
Supplement: c9cy02523e1.pdf [file c9cy02523e1.pdf]

## Supporting Information

**Ni-based catalysts supported on Mg-Al hydrotalcites with different morphologies for CO<sub>2</sub>**

**methanation: Exploring the effect of metal-support interaction**

Jie Ren, Chalachew Mebrahtu, Regina Palkovits \*

*Chair of Heterogeneous Catalysis and Chemical Technology, Institut für Technische und Makromolekulare Chemie (ITMC), RWTH Aachen University, Worringerweg 2, 52074 Aachen, Germany.*

\* Corresponding author. Tel.: +49 241 80 26497; Fax: +49 241 80 22177. E-mail address: Palkovits@itmc.rwth-aachen.de.

1. **Fig. S1.** TG and DTG curves of synthetic HT.
2. **Fig. S2.** Powder XRD patterns of different calcined Ni/HT catalysts.
3. **Fig. S3.** SEM images of the different synthesized Ni/HT catalysts.
4. **Fig. S4.** EDS images of designed Ni/HT catalysts.
5. **Fig. S5.** EF-TEM images of Ni/HT catalyst.
6. **Fig. S6.** STEM images of Ni/HT-10 catalyst.
7. **Fig. S7.** CO<sub>2</sub> conversion over different synthesized Ni/HT catalysts during 15 h.

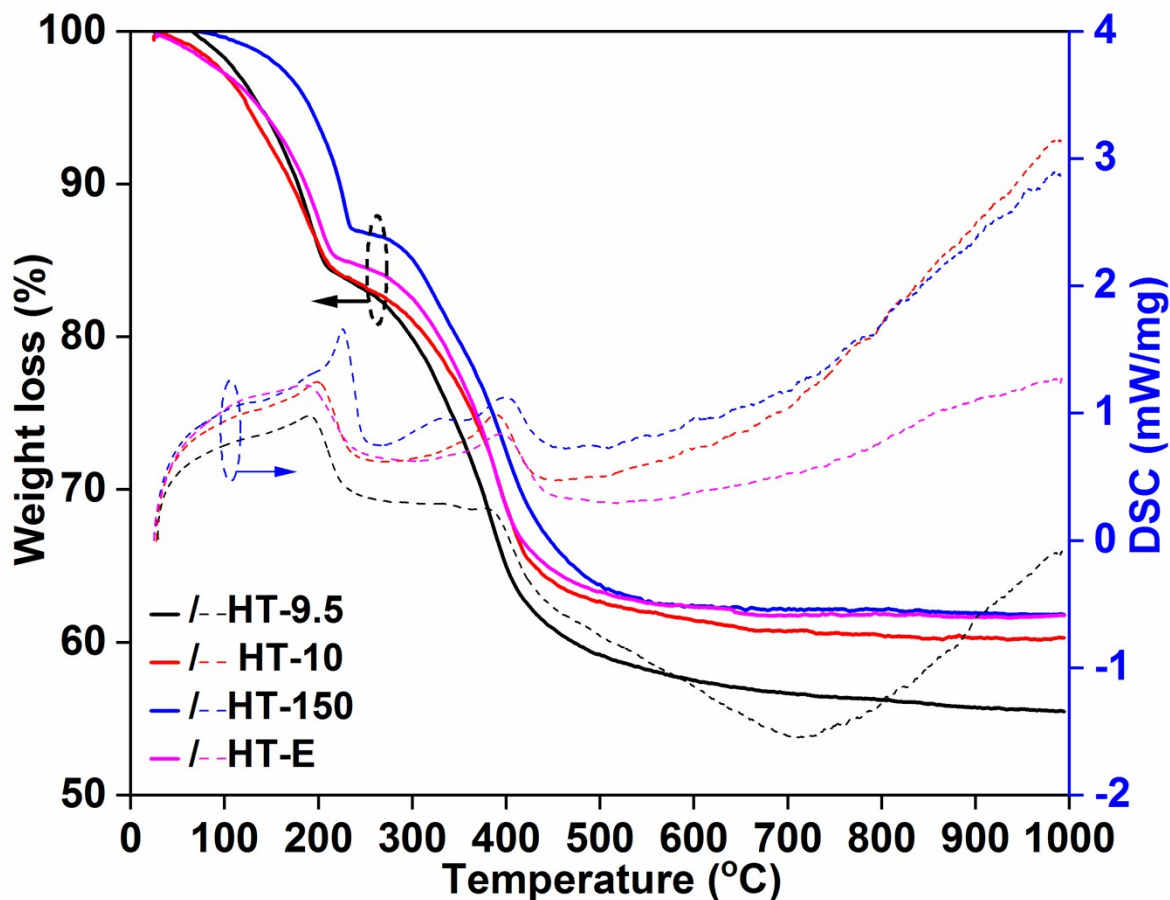

Fig. S1 TG and DTG curves of synthetic HT.

The TG-DSC experiments of the HT supports were also carried under air atmosphere, and the results were illustrated in **Fig. S1**. TG-DSC curves of the four as-prepared supports confirmed the formation of HT structure. The release of interlayer water taken place in the temperature of 140-260 °C, and then the two endothermic peaks between 250 to 450 °C were the -OH elimination and CO<sub>2</sub> release. For HT-E, the ethanol and water molecules enter into the interlayer gallery resulted in the peak difference. The peak difference of HT-150 was resulted from the environments changes of water molecules when prepared at high temperature.

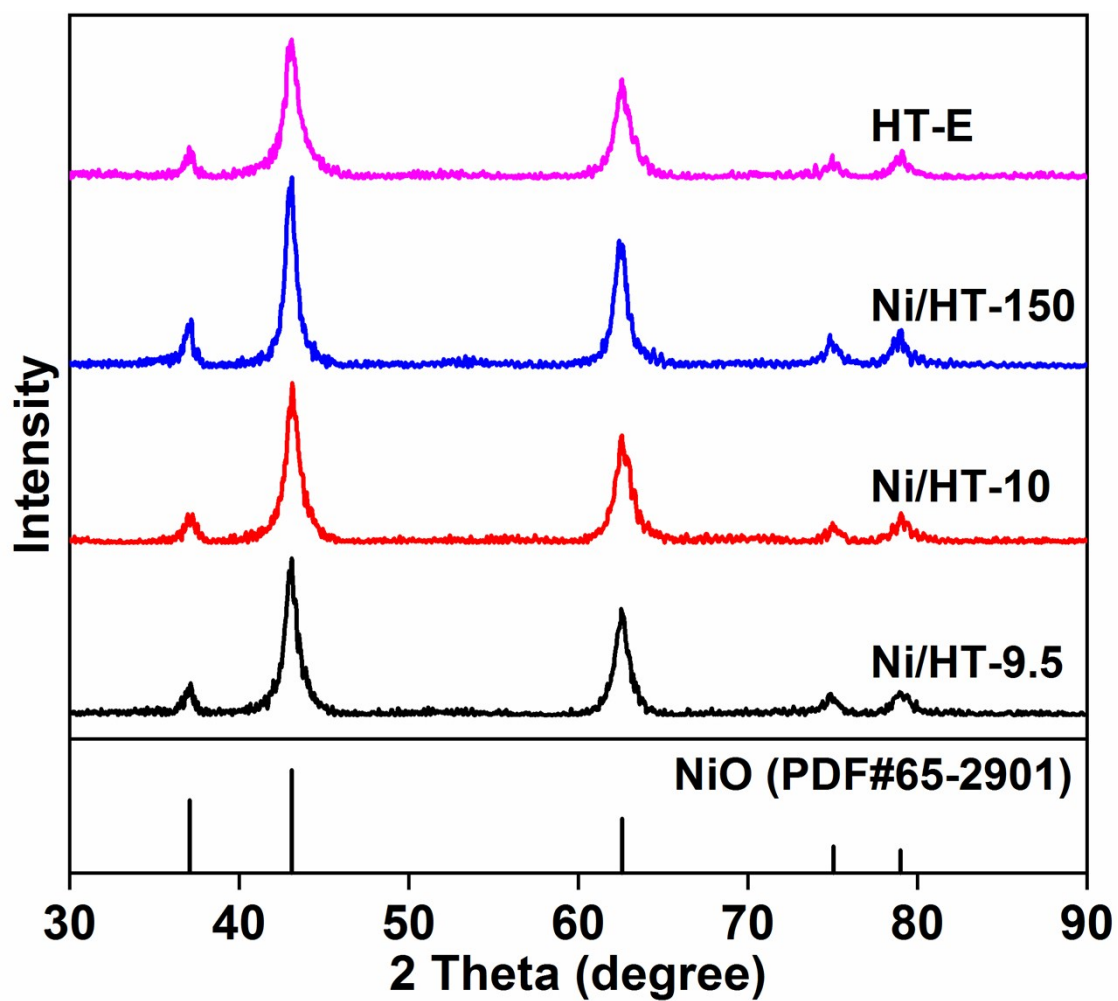

**Fig. S2** Powder XRD patterns of different calcined Ni/HT catalysts. NiO crystallite size of Ni/HT-9.5, Ni/HT-10, Ni/HT-150, and Ni/HT-E are 7.5, 7.1, 8.6, and 6.8 nm, respectively.

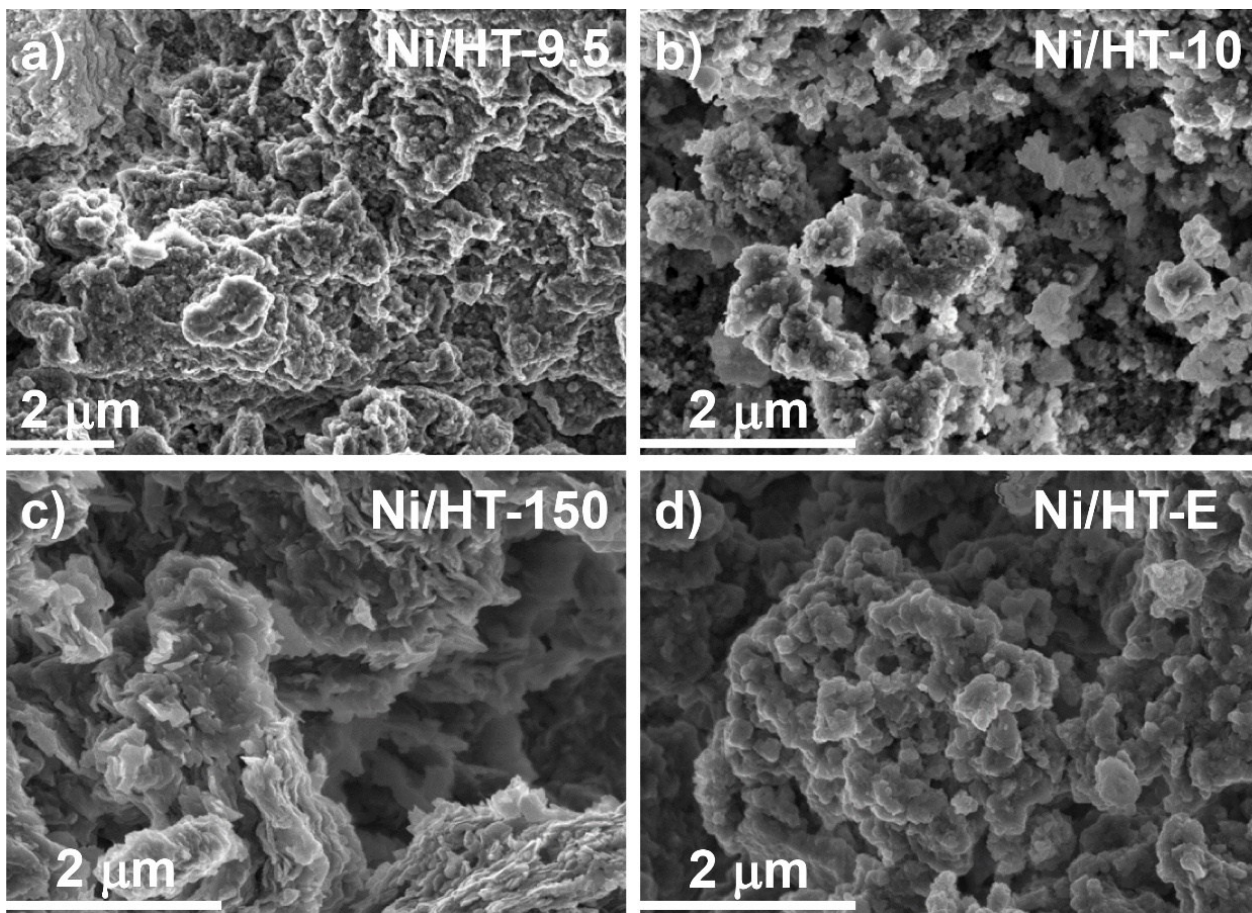

**Fig. S3** SEM images of the different synthesized Ni/HT catalysts.

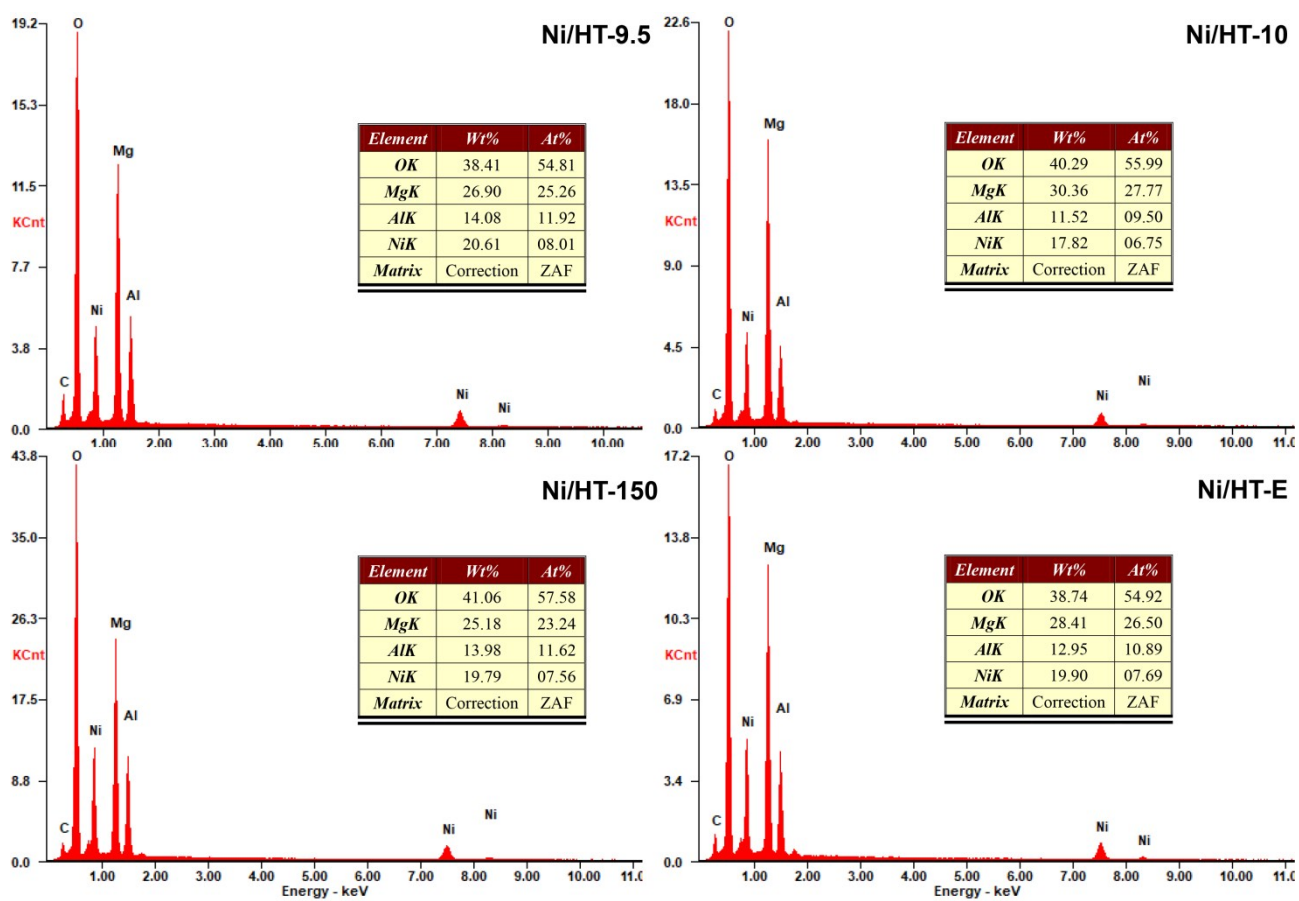

Fig. S4 EDS images of designed Ni/HT catalysts.

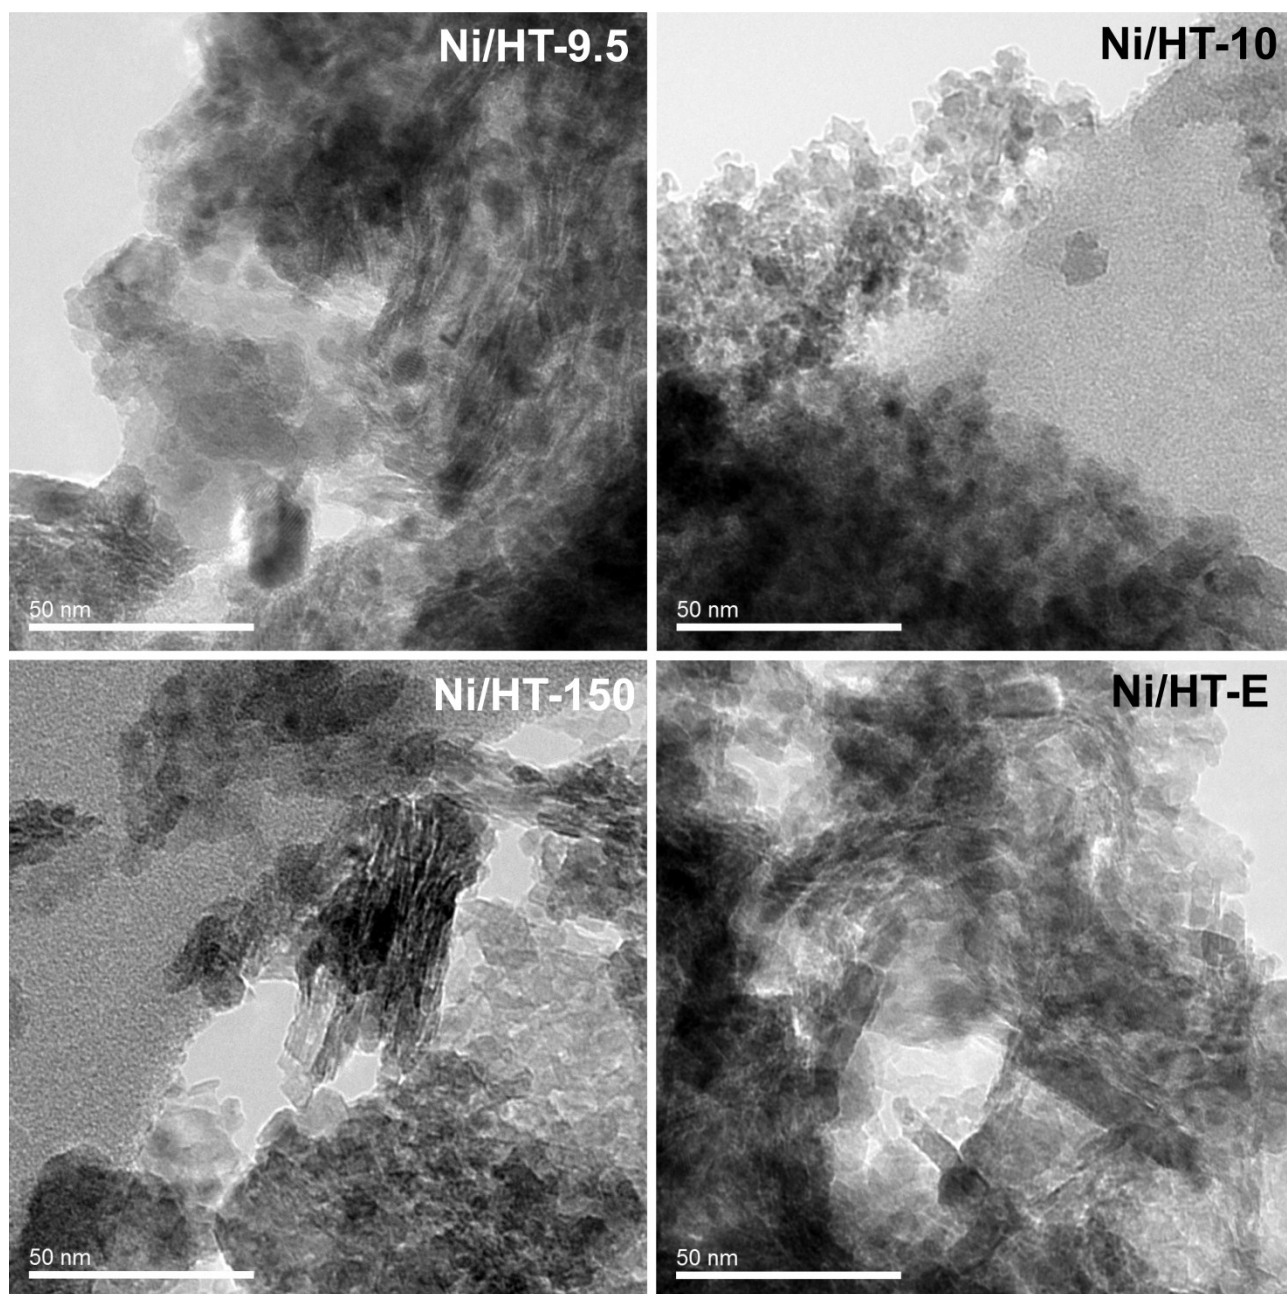

**Fig. S5** EF-TEM images of Ni/HT catalyst.

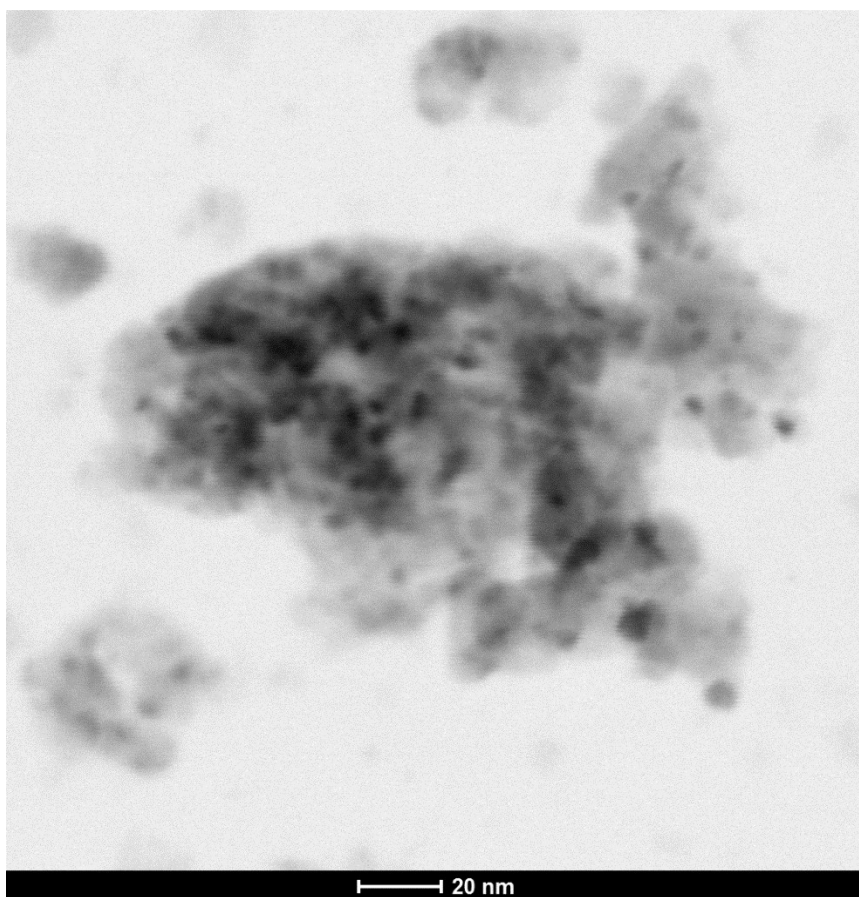

**Fig. S6** STEM images of Ni/HT-10 catalyst.

*Stability of the Ni/HT catalysts*

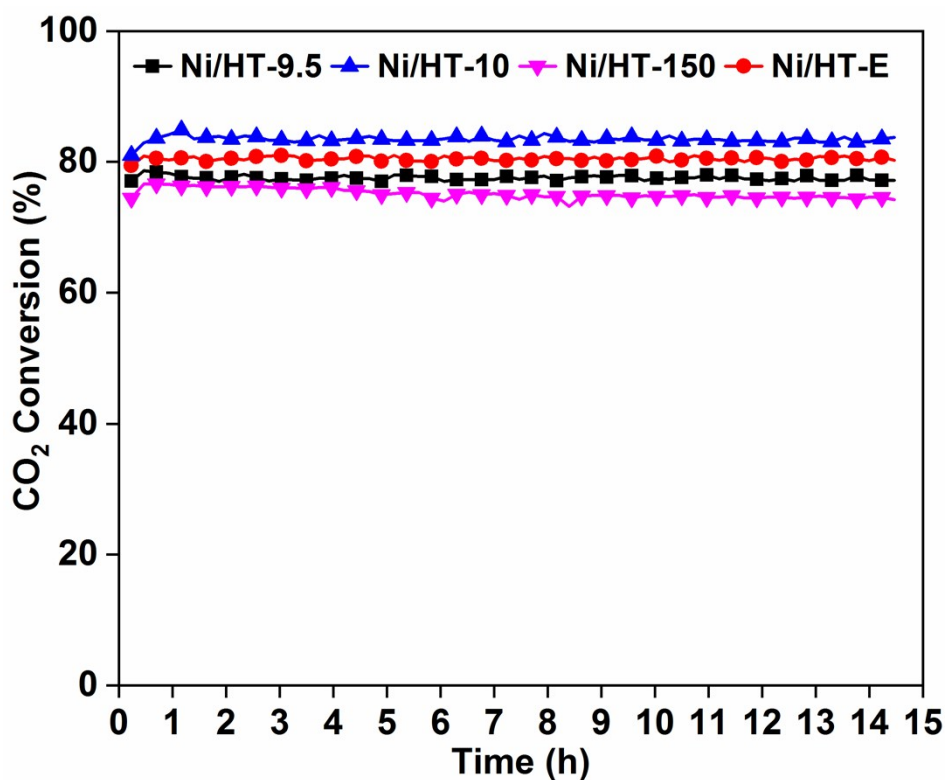

**Fig. S7** CO<sub>2</sub> conversion over different synthesized Ni/HT catalysts during 15 h.

After the optimum reaction temperature determined, the short-term stability of all the Ni/HT catalysts were tested for 15 h. The result of CO<sub>2</sub> conversion over different Ni/HT catalysts are shown in **Fig. S7**. At the beginning, the activity of four Ni/HT catalysts were increased sharply at the first 1 h and show great stability during 15 h reaction.
